# Supplementary material for: Ligand-centered to metal-centered activation of a Rh(iii) photosensitizer revealed by ab initio molecular dynamics simulations
Source: Royal Society of Chemistry journal article supplement (doi:10.1039/d3sc04381a), 2023-01-01
Supplement: d3sc04381a1.pdf [file d3sc04381a1.pdf]

## Supplemental Information for “Ligand-Centered to Metal-Centered Activation of a Rh(III) Photosensitizer revealed by Ab Initio Molecular Dynamics Simulations”

Iria Bolaño Losada<sup>a</sup> and Petter Persson<sup>\*a</sup>  
*Division of Computational Chemistry, Department of Chemistry,  
Lund University, Box 124, SE-22100 Lund, Sweden.*

### List of Figures

|       |                                                                                              |   |
|-------|----------------------------------------------------------------------------------------------|---|
| SI.1  | Energy and average metal-ligand bond distances of <sup>3</sup> LC and <sup>3</sup> MC states | 2 |
| SI.2  | <sup>3</sup> LC and <sup>3</sup> MC states <sup>α</sup> SOMO orbital                         | 3 |
| SI.3  | <sup>3</sup> LC metal-ligand bond distance distributions                                     | 4 |
| SI.4  | <sup>3</sup> LC dipole moment histogram                                                      | 4 |
| SI.5  | <sup>3</sup> LC atom spin density progression                                                | 5 |
| SI.6  | Root mean square deviations                                                                  | 6 |
| SI.7  | <sup>3</sup> MC state Phenanthroline bite angles                                             | 7 |
| SI.8  | AIMD trajectories at 170 K                                                                   | 8 |
| SI.9  | AIMD trajectories at 200 K                                                                   | 8 |
| SI.10 | <sup>3</sup> LC to <sup>3</sup> MC minimum energy path                                       | 9 |

### List of Tables

|       |                                                                                                         |    |
|-------|---------------------------------------------------------------------------------------------------------|----|
| SI.1  | <sup>3</sup> LC emission energy                                                                         | 2  |
| SI.2  | Metal-ligand bond distances                                                                             | 3  |
| SI.3  | <sup>3</sup> LC and <sup>3</sup> MC states energies                                                     | 3  |
| SI.4  | Bonds standard deviations and effective volumes                                                         | 8  |
| SI.5  | <sup>3</sup> LC to <sup>3</sup> MC crossover entropy change                                             | 9  |
| SI.6  | <sup>3</sup> LC coordinates at B3LYP*/3-21G/PCM(Acetonitrile)                                           | 10 |
| SI.7  | <sup>3</sup> MC <sub>1</sub> coordinates at B3LYP*/3-21G/PCM(Acetonitrile)                              | 11 |
| SI.8  | <sup>3</sup> MC <sub>2</sub> coordinates at B3LYP*/3-21G/PCM(Acetonitrile)                              | 12 |
| SI.9  | <sup>3</sup> MC <sub>3</sub> coordinates at B3LYP*/3-21G/PCM(Acetonitrile)                              | 13 |
| SI.10 | <sup>3</sup> LC coordinates at B3LYP*/6-311G(d,f)/PCM(Acetonitrile)                                     | 14 |
| SI.11 | <sup>3</sup> MC <sub>1</sub> coordinates at B3LYP*/6-311G(d,f)/PCM(Acetonitrile)                        | 15 |
| SI.12 | <sup>3</sup> MC <sub>2</sub> coordinates at B3LYP*/6-311G(d,f)/PCM(Acetonitrile)                        | 16 |
| SI.13 | <sup>3</sup> MC <sub>3</sub> coordinates at B3LYP*/6-311G(d,f)/PCM(Acetonitrile)                        | 17 |
| SI.14 | <sup>3</sup> MC <sub>4</sub> coordinates at B3LYP*/6-311G(d,f)/PCM(Acetonitrile)                        | 18 |
| SI.15 | <sup>3</sup> LC frequency list (cm <sup>-1</sup> ) at B3LYP*/3-21G/PCM(Acetonitrile)                    | 19 |
| SI.16 | <sup>3</sup> MC <sub>1</sub> frequency list (cm <sup>-1</sup> ) at B3LYP*/3-21G/PCM(Acetonitrile)       | 20 |
| SI.17 | <sup>3</sup> MC <sub>2</sub> frequency list (cm <sup>-1</sup> ) at B3LYP*/3-21G/PCM(Acetonitrile)       | 21 |
| SI.18 | <sup>3</sup> MC <sub>3</sub> frequency list (cm <sup>-1</sup> ) at B3LYP*/3-21G/PCM(Acetonitrile)       | 22 |
| SI.19 | <sup>3</sup> LC frequency list (cm <sup>-1</sup> ) at B3LYP*/6-311G(d,f)/PCM(Acetonitrile)              | 23 |
| SI.20 | <sup>3</sup> MC <sub>1</sub> frequency list (cm <sup>-1</sup> ) at B3LYP*/6-311G(d,f)/PCM(Acetonitrile) | 24 |
| SI.21 | <sup>3</sup> MC <sub>2</sub> frequency list (cm <sup>-1</sup> ) at B3LYP*/6-311G(d,f)/PCM(Acetonitrile) | 25 |
| SI.22 | <sup>3</sup> MC <sub>3</sub> frequency list (cm <sup>-1</sup> ) at B3LYP*/6-311G(d,f)/PCM(Acetonitrile) | 26 |
| SI.23 | <sup>3</sup> MC <sub>4</sub> frequency list (cm <sup>-1</sup> ) at B3LYP*/6-311G(d,f)/PCM(Acetonitrile) | 27 |

## I. COMPUTATIONAL DETAILS

The Ab initio molecular dynamics (AIMD) calculations were carried out using an UltraFine integration grid, and the nature of the different optimized triplet excited states were confirmed by evaluating the spin density distribution. Full SCF convergence (FullSCF keyword) and allowing quadratic convergence (XQC) if needed was requested for each MD step allowing the equations of motions to be updated with a typical step size of 0.5 fs, and the fictitious electronic mass of 0.1 amu. In some AIMD simulations, the step size was reduced to 0.4 fs for validation purposes, or to avoid nonphysical bond displacement. All systems were initially equilibrated for 2.5 ps in the case of the  $^3\text{LC}$  state, and 3.5 ps for the  $^3\text{MC}$  states as suggested from analyzing the root mean squared deviation (RMSD) stability over time. Subsequent MD production trajectories were recorded and analyzed during a total time of 15 ps for a full analysis at 200 K, as well as shorter simulations of 7.5 ps for the temperature study at 170 K and 298 K. A thermostat was set to control the temperature (IOp(1/8x) options) allowing deviations of maximum 50 K, reevaluating and rescaling every 10 steps all along the simulation. An AIMD simulation at 330 K for studying the crossover process was initially set at the  $^3\text{LC}$  state and equilibrated during 2.5 ps, followed by production trajectories and sampling collected until  $^3\text{LC} \rightarrow ^3\text{MC}$  conversion had been clearly established. We have performed minimum energy path calculations between the  $^3\text{LC}$  and  $^3\text{MC}_2$  states structures by linearly interpolating 20 intermediate points, with average steps of the six metal-ligand bonds of approximately 0.004 Å, and subsequently relaxing the structure with constrained metal-ligand bonds, at the same B3LYP\*/3-21G/PCM(Water) level of theory.

TABLE SI.1:  $^3\text{LC}$  emission energy (in eV) calculated with 6-311G(d,f) and 3-21G basis sets for a series of functionals. Experimental energy (Exp) is also tabulated.

| State  | $^3\text{LC}$ Emission (eV) |       |
|--------|-----------------------------|-------|
|        | 6-311G(d,f)                 | 3-21G |
| B3LYP  | 2.382                       | 2.446 |
| B3LYP* | 2.402                       | 2.443 |
| O3LYP  | 2.415                       | 2.475 |
| PBE    | 2.344                       | 2.424 |
| PBE0   | 2.357                       | 2.434 |
| TPSSh  | 2.323                       | 3.386 |
| M06    | 2.350                       | 2.337 |
| BMK    | 2.493                       | 2.651 |
| Exp    | 2.38                        | 2.38  |

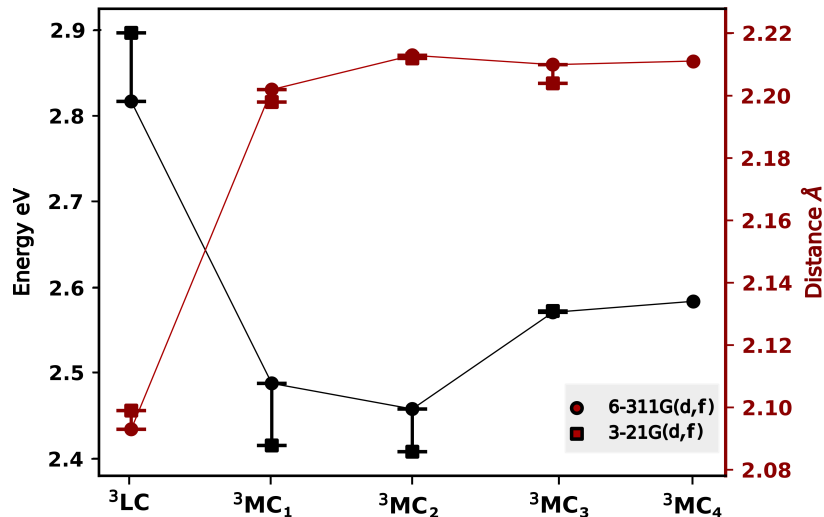

FIG. SI.1: Average metal-ligand bond distances in Å (red) and energies respect to to the ground state in eV (black) for the hexa-coordinated complex  $[\text{Rh}(\text{III})(\text{phen})_2(\text{NH}_3)_2]^{3+}$  for  $^3\text{LC}$ ,  $^3\text{MC}_1$ ,  $^3\text{MC}_2$ ,  $^3\text{MC}_3$  and  $^3\text{MC}_4$  states. (Dot markers) B3LYP\*/6-311G(d)/PCM(water), (Square markers) B3LYP\*/3-21G(d)/PCM(water).

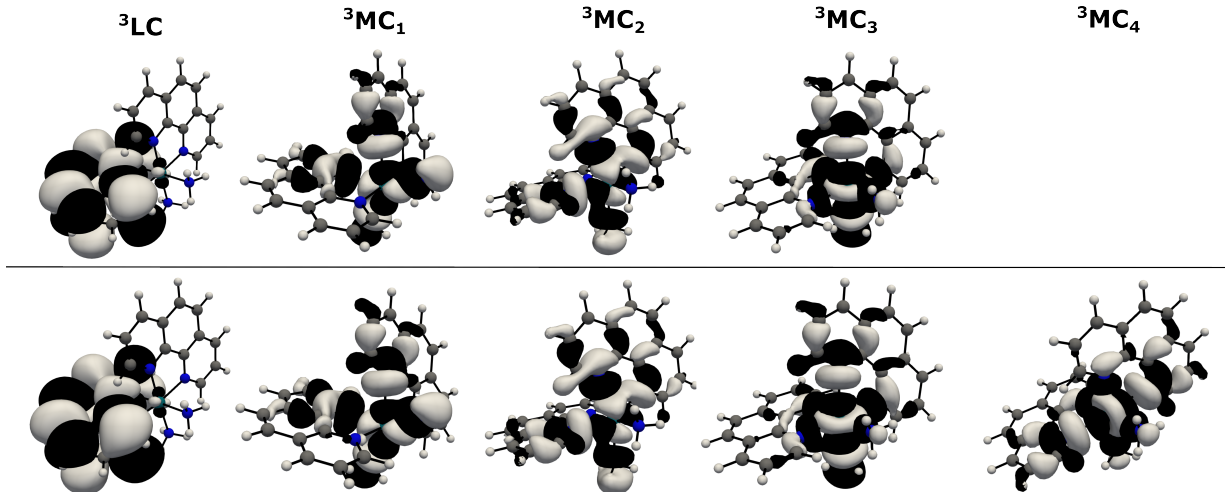

FIG. SI.2:  $\alpha$ SOMO orbital representation of the  ${}^3LC$ ,  ${}^3MC_1$ ,  ${}^3MC_2$ ,  ${}^3MC_3$  and  ${}^3MC_4$  excited states (top panel) B3LYP\*/3-21G(d)/PCM(water), (lower panel) B3LYP\*/6-311G(d)/PCM(water).

TABLE SI.2: Metal-ligand bond distances Rh-N<sub>1</sub>, Rh-N'<sub>1</sub>, Rh-N<sub>2</sub>, Rh-N'<sub>2</sub>, Rh-N<sub>a</sub>, Rh-N'<sub>a</sub> as well as average distances in Å in the optimized hexa-coordinated [Rh(III)(phen)<sub>2</sub>(NH<sub>3</sub>)<sub>2</sub>]<sup>3+</sup> complex in the  ${}^3LC$  and  ${}^3MC$  states at B3LYP\*/6-311G(d,f)/PCM(water) and B3LYP\*/3-21G(d,f)/PCM(water) levels of calculation.

| Bond                | ${}^3LC$    |       | ${}^3MC_1$  |       | ${}^3MC_2$  |       | ${}^3MC_3$  |       | ${}^3MC_4$  |       |
|---------------------|-------------|-------|-------------|-------|-------------|-------|-------------|-------|-------------|-------|
|                     | 6-311G(d,f) | 3-21G | 6-311G(d,f) | 3-21G | 6-311G(d,f) | 3-21G | 6-311G(d,f) | 3-21G | 6-311G(d,f) | 3-21G |
| Rh-N1               | 2.084       | 2.089 | 2.088       | 2.089 | 2.198       | 2.193 | 2.185       | 2.168 | 2.413       | N/A   |
| Rh-N1'              | 2.090       | 2.095 | 2.088       | 2.088 | 2.277       | 2.268 | 2.094       | 2.102 | 2.399       | N/A   |
| Rh-N2               | 2.078       | 2.083 | 2.290       | 2.327 | 2.376       | 2.413 | 2.332       | 2.309 | 2.088       | N/A   |
| Rh-N2'              | 2.079       | 2.085 | 2.290       | 2.327 | 2.091       | 2.088 | 2.116       | 2.147 | 2.084       | N/A   |
| Rh-N <sub>a</sub>   | 2.114       | 2.122 | 2.216       | 2.191 | 2.205       | 2.207 | 2.403       | 2.350 | 2.141       | N/A   |
| Rh-N <sub>a</sub> ' | 2.112       | 2.122 | 2.217       | 2.191 | 2.118       | 2.112 | 2.129       | 2.148 | 2.139       | N/A   |
| Average             | 2.093       | 2.099 | 2.202       | 2.198 | 2.213       | 2.212 | 2.210       | 2.204 | 2.211       | N/A   |

TABLE SI.3: Relative energies (E, in eV) of the  ${}^3LC$  and  ${}^3MC$  states with respect to the  ${}^1GS$  of the [Rh(III)(phen)<sub>2</sub>(NH<sub>3</sub>)<sub>2</sub>]<sup>3+</sup> complex at the B3LYP\*/6-311G(d,f)/PCM(water) and B3LYP\*/3-21G(d,f)/PCM(water) levels of calculation. Gibbs free energies ( $\Delta G$ , in eV and kJ/mol) with respect to the  ${}^1GS$ , dipole moment (Debye) and the frequency ( $\text{cm}^{-1}$ ) of lower energy are also included for each state.

| State      | E (eV)      |       | $\Delta G$ (eV)/(kJ/mol) |               | $\mu$ (D)   |        | $\rho_M$    |       | f ( $\text{cm}^{-1}$ ) |         |
|------------|-------------|-------|--------------------------|---------------|-------------|--------|-------------|-------|------------------------|---------|
|            | 6-311G(d,f) | 3-21G | 6-311G(d,f)              | 3-21G         | 6-311G(d,f) | 3-21G  | 6-311G(d,f) | 3-21G | 6-311G(d,f)            | 3-21G   |
| ${}^3LC$   | 2.817       | 2.897 | 2.615/252.309            | 2.689/259.449 | 7.568       | 7.862  | 0.004       | 0.003 | 26.3764                | 26.5870 |
| ${}^3MC_1$ | 2.488       | 2.415 | 2.232/215.355            | 2.202/212.461 | 7.732       | 8.084  | 1.448       | 1.443 | 25.706                 | 26.483  |
| ${}^3MC_2$ | 2.458       | 2.408 | 2.277/219.697            | 2.233/215.452 | 10.682      | 10.743 | 1.484       | 1.475 | 22.808                 | 30.922  |
| ${}^3MC_3$ | 2.571       | 2.572 | 2.283/220.276            | 2.272/219.215 | 7.828       | 8.448  | 1.488       | 1.478 | 22.401                 | 13.908  |
| ${}^3MC_4$ | 2.583       | N/A   | 2.347/226.451            | N/A           | 7.652       | N/A    | 1.469       | N/A   | 23.626                 | N/A     |

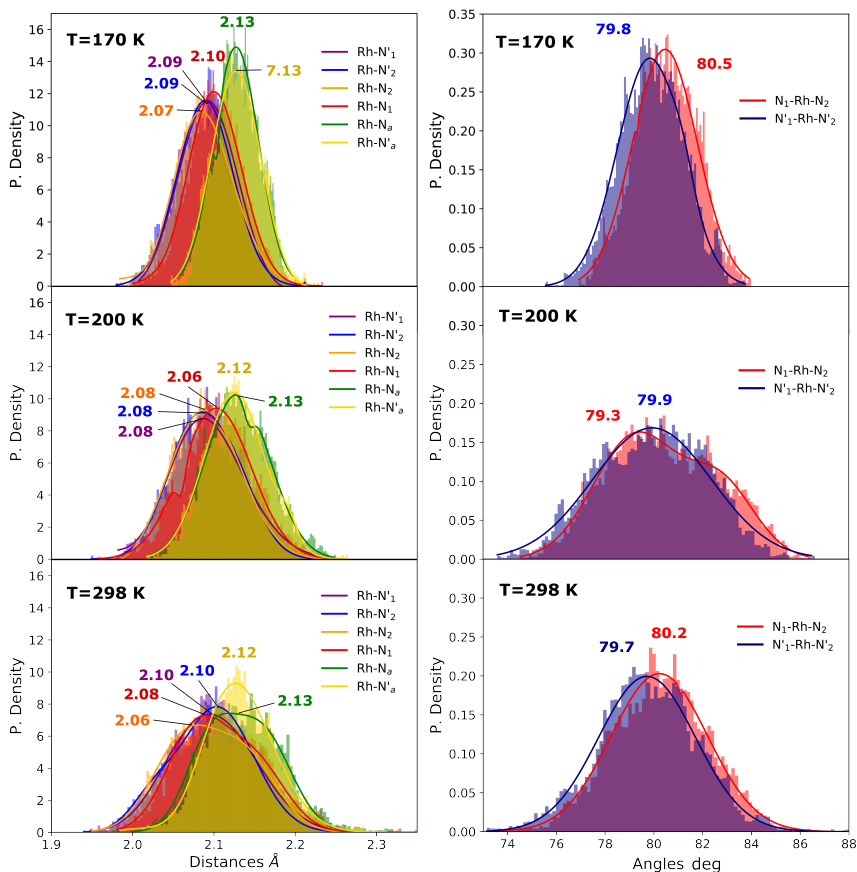

FIG. SI.3:  $^3\text{LC}$  metal-ligand bond distance distributions in Å for the hexa-coordinated  $[\text{Rh}(\text{III})(\text{phen})_2(\text{NH}_3)_2]^{3+}$  (Rh-N'1 in purple and Rh-N'2 in blue, Rh-N1 in red and Rh-N2 in orange and Rh-N'a in yellow and Rh-Na in green) together with phenantroline bite angle distributions  $\alpha$  (phen ligand) and  $\beta$  (phen' ligand) in degrees (deg) during 7.5 ps AIMD sampling at (top panel) 170 K, (middle panel), 200 K (bottom panel) 298 K.

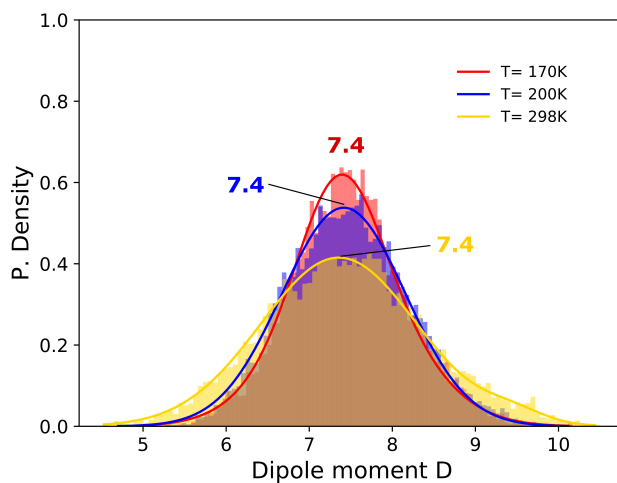

FIG. SI.4: Dipole moment histogram in Debye (D) for the  $^3\text{LC}$  states in the  $[\text{Rh}(\text{III})(\text{phen})_2(\text{NH}_3)_2]^{3+}$  complex for 7.5 ps of AIMD sampling at (red) 170 K, (blue) 200 K, (yellow) 298 K.



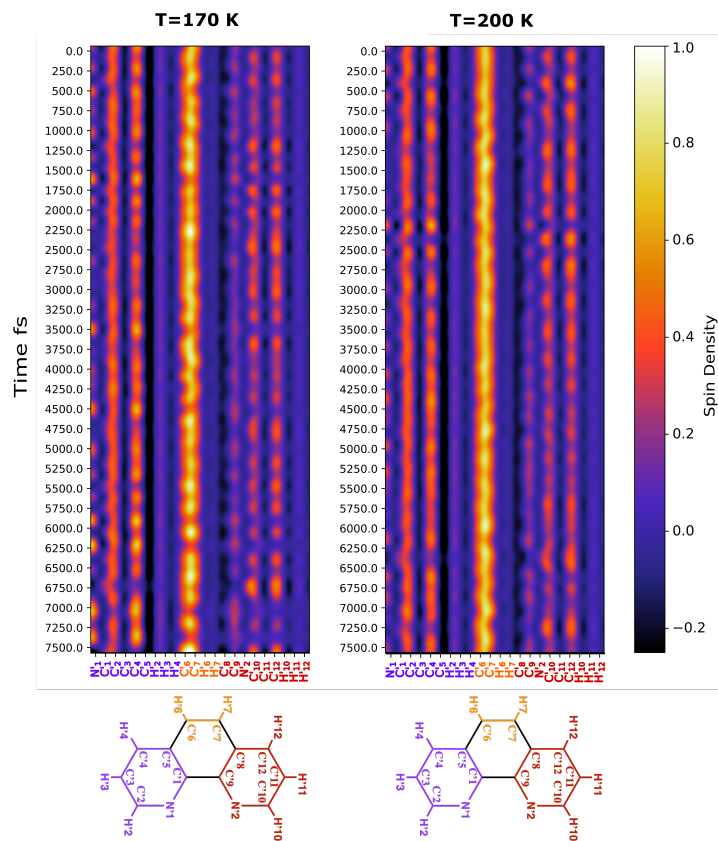

FIG. SI.5: Atom spin density population progression along time in an AIMD simulation of 7500 fs in the phenantroline phen' ligand of the  $[\text{Rh}(\text{III})(\text{phen})_2(\text{NH}_3)_2]^{3+}$  complex at (left) 170 K, (right) 200 K. Atom numbering presented below and color code.

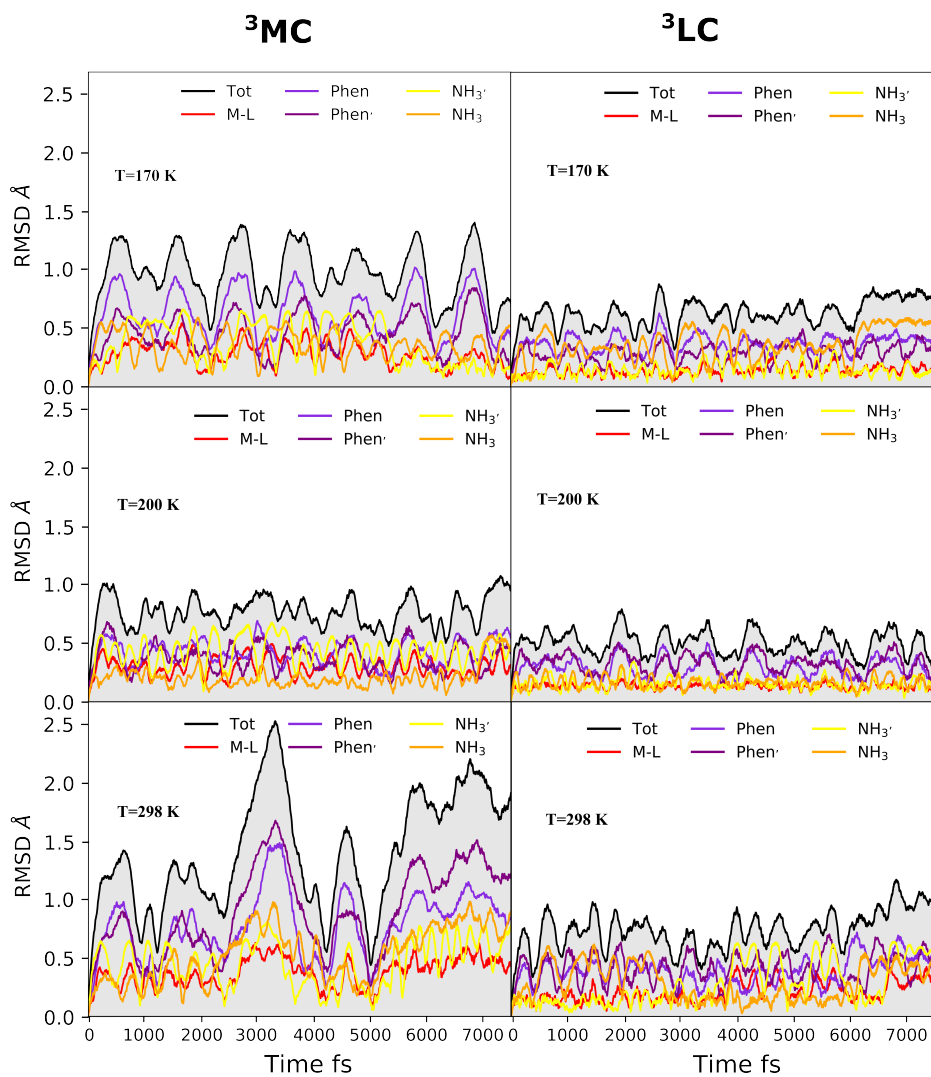

FIG. S1.6: Root mean square deviation (RMSD) plots over time with the corresponding ligand contribution to the total RMSD for the  $^3\text{MC}$  and  $^3\text{LC}$  AIMD sampling in the  $[\text{Rh}(\text{III})(\text{phen})_2(\text{NH}_3)_2]^{3+}$  complex at (top panel) 170 K, (middle panel) 200 K, (bottom panel) 298 K

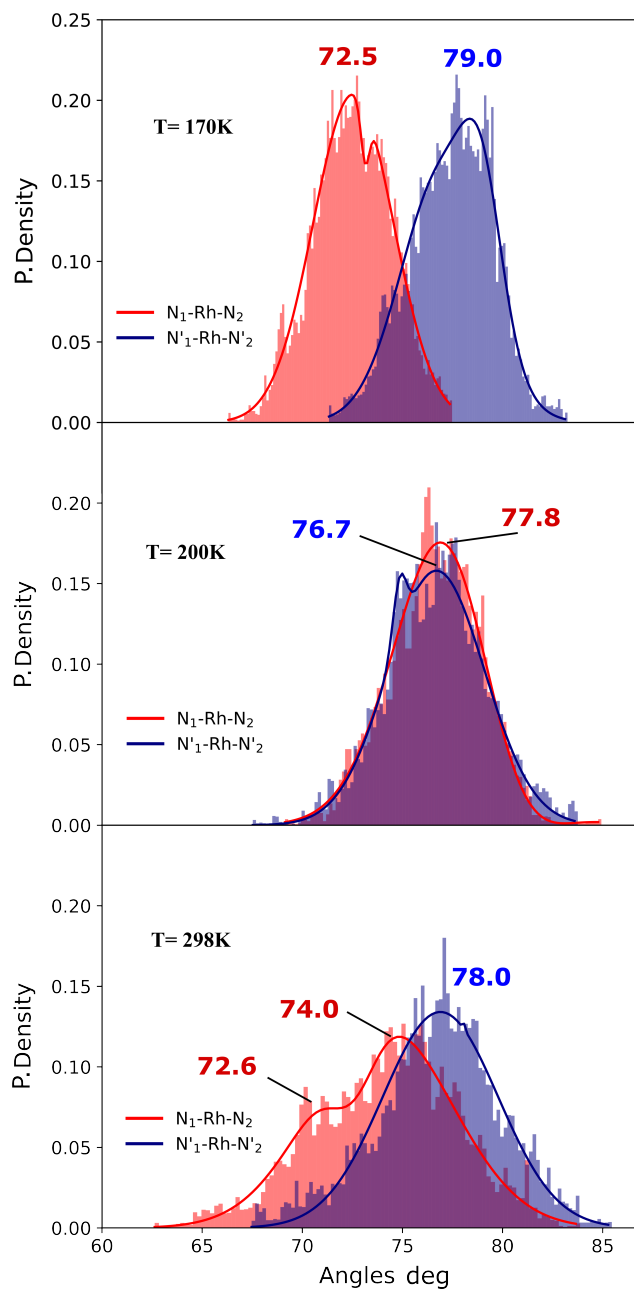

FIG. SI.7: Phenantroline bite angles distributions in degrees (deg) for phen ligand  $\alpha$  and phen' ligand  $\beta$  during 7.5 ps AIMD sampling in the  $^3\text{MC}$  state in the  $[\text{Rh(III)}(\text{phen})_2(\text{NH}_3)_2]^{3+}$  complex at (top panel) 170 K, (middle panel) 200 K, (bottom panel) 298 K.

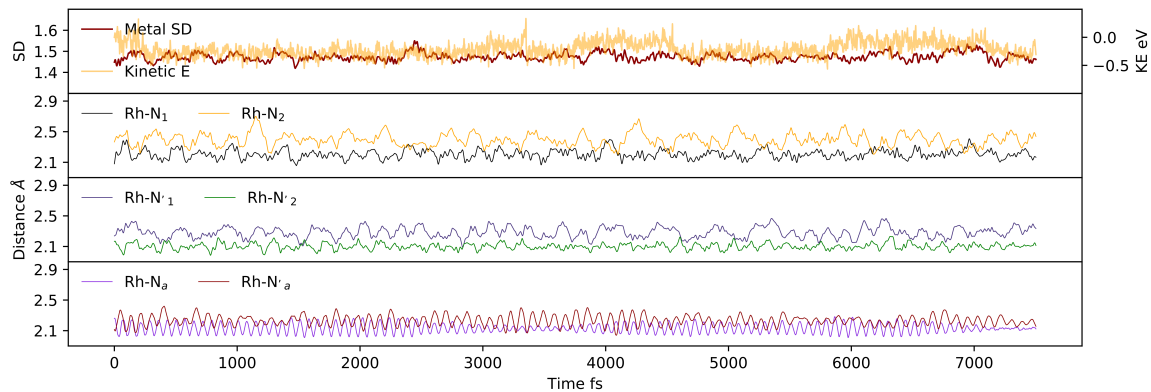

FIG. SI.8: AIMD trajectories over simulation time (7500 fs) at 170 K, (top panel) metal spin density (SD) in red color, (top panel) kinetic energy (KE) fluctuation respect to the first production snapshot in yellow and (lower panels) metal to ligand bond distances (in Å) for both bidentate ligands, phen (Rh-N<sub>1</sub> in black and Rh-N<sub>2</sub> in yellow) and phen' (Rh-N'<sub>1</sub> in blue and Rh-N'<sub>2</sub> in green) and both amine groups (Rh-N<sub>a</sub> in purple and Rh-N'<sub>a</sub> in red).

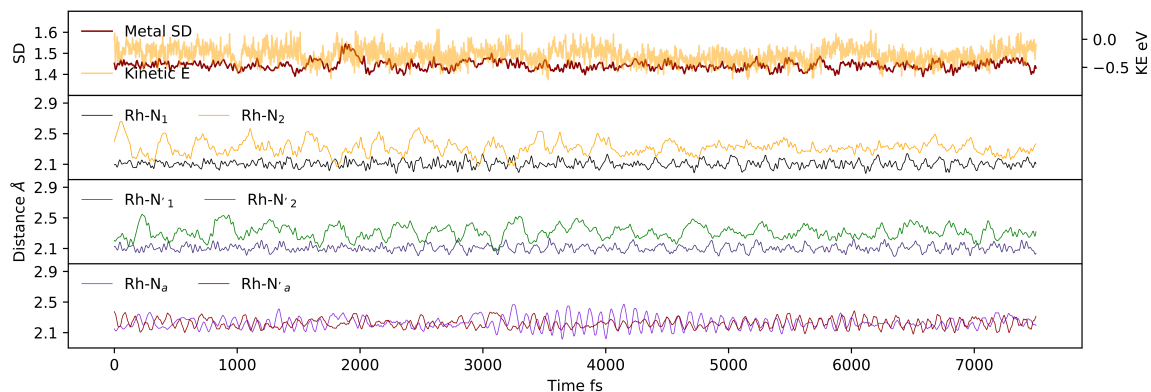

FIG. SI.9: AIMD trajectories over simulation time (7500 fs) at 200 K, (top panel) metal spin density (SD) in red color, (top panel) kinetic energy (KE) fluctuation respect to the first production snapshot in yellow and (lower panels) metal to ligand bond distances (in Å) for both bidentate ligands, phen (Rh-N<sub>1</sub> in black and Rh-N<sub>2</sub> in yellow) and phen' (Rh-N'<sub>1</sub> in blue and Rh-N'<sub>2</sub> in green) and both amine groups (Rh-N<sub>a</sub> in purple and Rh-N'<sub>a</sub> in red).

TABLE SI.4: Metal-ligand bond distance standard deviation and effective volumes calculated from a 7.5 ps AIMD simulation in the <sup>3</sup>MC and <sup>3</sup>LC states at 298 K, 200 K and 170 K.

| $\delta l$ (Å)      | <sup>3</sup> MC       |                       |                       | <sup>3</sup> LC       |                       |                       |
|---------------------|-----------------------|-----------------------|-----------------------|-----------------------|-----------------------|-----------------------|
|                     | T=298 (K)             | T=200 (K)             | T=170 (K)             | T=298 (K)             | T=200 (K)             | T=170 (K)             |
| $\delta l_{Rh-N1}$  | 0.1151                | 0.0408                | 0.0583                | 0.0541                | 0.0405                | 0.0331                |
| $\delta l_{Rh-N'1}$ | 0.1360                | 0.0406                | 0.0697                | 0.0509                | 0.0426                | 0.0327                |
| $\delta l_{Rh-N2}$  | 0.1537                | 0.0821                | 0.0837                | 0.0512                | 0.0407                | 0.0373                |
| $\delta l_{Rh-N'2}$ | 0.1248                | 0.0798                | 0.0405                | 0.0510                | 0.0405                | 0.0346                |
| $\delta l_{Rh-Na}$  | 0.0904                | 0.0545                | 0.0675                | 0.0442                | 0.0399                | 0.0257                |
| $\delta l_{Rh-N'a}$ | 0.0813                | 0.0640                | 0.0619                | 0.0451                | 0.0352                | 0.0289                |
| V (Å <sup>6</sup> ) | $2.21 \times 10^{-6}$ | $3.79 \times 10^{-8}$ | $5.76 \times 10^{-8}$ | $1.44 \times 10^{-8}$ | $4.00 \times 10^{-9}$ | $1.05 \times 10^{-9}$ |

TABLE SI.5:  ${}^3\text{LC}$  to  ${}^3\text{MC}$  crossover entropy change at AIMD sampling temperatures of 298 K, 200 K and 170 K.

| T (K) | $\Delta S$ (J/Kmol) |
|-------|---------------------|
| 298   | 41.8659             |
| 200   | 18.6980             |
| 170   | 33.3058             |

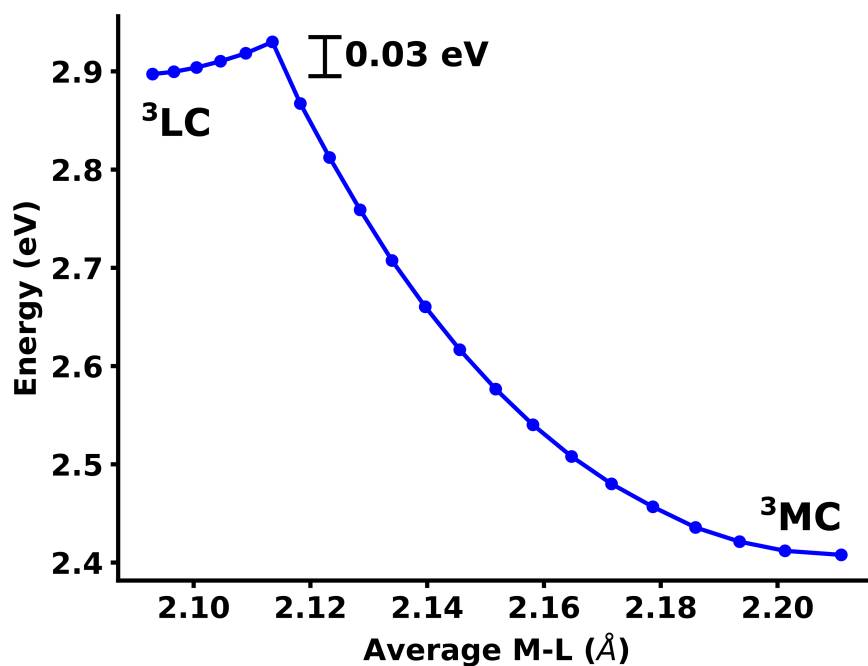FIG. SI.10: Minimum energy path between the  ${}^3\text{LC}$  and the  ${}^3\text{MC}_2$  optimized minimum geometries at the B3LYP\*/3-21G(d,f)/PCM(water) level of theory. The energies, in eV, are given with respect to the ground state energy.

TABLE SI.6:  $^3\text{LC}$  coordinates at B3LYP\*/3-21G/PCM(Acetonitrile)

53

N 1.929209 0.712291 -0.968539  
C 2.697730 0.103442 -0.014147  
C 4.045458 0.458517 0.210298  
C 4.589175 1.481711 -0.596223  
C 3.800510 2.085231 -1.553704  
C 2.469087 1.676109 -1.716088  
C 2.088405 -0.921869 0.765020  
C 2.828215 -1.588484 1.765072  
C 4.194837 -1.210878 1.977235  
C 4.778456 -0.230186 1.231969  
C 2.164777 -2.596884 2.497794  
C 0.847430 -2.889854 2.212944  
C 0.179962 -2.182979 1.201410  
N 0.783822 -1.225258 0.498858  
Rh -0.013319 -0.057751 -1.025247  
N -0.798923 1.269514 0.366780  
C -2.075478 1.019519 0.678325  
C -2.808108 1.812427 1.618117  
C -2.106302 2.902016 2.222943  
C -0.789165 3.134068 1.881328  
C -0.147584 2.311027 0.952767  
C -2.704488 -0.116237 0.009973  
C -4.069509 -0.448406 0.285715  
C -4.768935 0.332342 1.200019  
C -4.131498 1.477098 1.877517  
C -4.611082 -1.574067 -0.412731  
C -3.806077 -2.273727 -1.298314  
C -2.487964 -1.888483 -1.508191  
N -1.950233 -0.807219 -0.847691  
N 0.685890 -1.461997 -2.442406  
H -0.852841 -2.399110 0.958576  
H 0.309310 -3.659452 2.754407  
H 4.759188 -1.726220 2.748259  
H 2.696327 -3.134397 3.277310  
H 5.622313 1.785307 -0.457562  
H 5.814576 0.047040 1.400474  
H 1.837940 2.142868 -2.462004  
H 4.185412 2.873917 -2.189810  
H 0.881017 2.471477 0.662313  
H -0.232618 3.952952 2.323536  
H -4.713809 2.055730 2.585879  
H -2.616569 3.534205 2.942351  
H -5.641478 -1.867288 -0.241926  
H -5.804829 0.105647 1.427270  
H -1.840704 -2.422601 -2.188576  
H -4.189807 -3.131686 -1.839729  
H 0.070107 -1.583629 -3.246225  
H 1.592386 -1.188539 -2.822941  
H 0.819975 -2.385043 -2.028640  
N -0.727783 1.180795 -2.580392  
H -0.870050 2.141368 -2.267386  
H -0.115574 1.224115 -3.394710  
H -1.631921 0.856515 -2.925265

TABLE SI.7:  ${}^3\text{MC}_1$  coordinates at B3LYP\*/3-21G/PCM(Acetonitrile)

53

N 2.011148 -1.157540 -0.558657  
 C 2.733695 -0.100797 -0.052888  
 C 4.101398 0.079720 -0.377194  
 C 4.709849 -0.872020 -1.229883  
 C 3.969415 -1.940021 -1.706490  
 C 2.616396 -2.059576 -1.353458  
 C 2.086286 0.817018 0.831529  
 C 2.808353 1.911217 1.369552  
 C 4.188228 2.083746 1.011092  
 C 4.809165 1.202402 0.173758  
 C 2.116278 2.781285 2.247385  
 C 0.786859 2.540369 2.551452  
 C 0.134266 1.432333 1.979410  
 N 0.773937 0.601548 1.145100  
 Rh -0.000026 -1.224616 -0.000040  
 N -0.773748 0.602089 -1.144715  
 C -2.086159 0.817400 -0.831376  
 C -2.808155 1.911710 -1.369278  
 C -2.115924 2.782040 -2.246735  
 C -0.786428 2.541284 -2.550554  
 C -0.133909 1.433132 -1.978635  
 C -2.733720 -0.100644 0.052727  
 C -4.101491 0.079770 0.376788  
 C -4.809196 1.202524 -0.174109  
 C -4.188122 2.084080 -1.011117  
 C -4.710075 -0.872112 1.229223  
 C -3.969698 -1.940154 1.705831  
 C -2.616614 -2.059620 1.353032  
 N -2.011253 -1.157477 0.558450  
 N 0.615286 -2.130286 1.927293  
 H -0.904904 1.218253 2.201794  
 H 0.237954 3.188033 3.223727  
 H 4.728054 2.928545 1.425192  
 H 2.637201 3.630582 2.677050  
 H 5.755334 -0.760039 -1.497011  
 H 5.853265 1.330599 -0.090568  
 H 2.024805 -2.892570 -1.709743  
 H 4.411113 -2.689618 -2.350857  
 H 0.905304 1.219135 -2.200896  
 H -0.237416 3.189155 -3.222544  
 H -4.727915 2.928939 -1.425142  
 H -2.636795 3.631422 -2.676297  
 H -5.755616 -0.760215 1.496159  
 H -5.853372 1.330596 0.089977  
 H -2.025066 -2.892657 1.709283  
 H -4.411487 -2.689843 2.350030  
 H 0.471942 -3.149705 1.848355  
 H 1.616186 -1.953052 2.089956  
 H 0.076591 -1.763919 2.724671  
 N -0.615680 -2.129911 -1.927278  
 H -0.077174 -1.763278 -2.724660  
 H -0.472200 -3.149333 -1.848643  
 H -1.616638 -1.952784 -2.089744

TABLE SI.8:  ${}^3\text{MC}_2$  coordinates at B3LYP\*/3-21G/PCM(Acetonitrile)

53

N -1.963897 0.623830 0.982750  
 C -2.625956 0.190657 -0.124665  
 C -3.885968 0.716820 -0.496684  
 C -4.449224 1.704377 0.340643  
 C -3.770762 2.112554 1.470931  
 C -2.518425 1.550154 1.760684  
 C -2.021552 -0.838737 -0.909666  
 C -2.676906 -1.314031 -2.069266  
 C -3.938647 -0.743052 -2.439661  
 C -4.521807 0.227900 -1.683720  
 C -2.052021 -2.347126 -2.799750  
 C -0.852657 -2.862609 -2.357354  
 C -0.266660 -2.346304 -1.194073  
 N -0.826268 -1.359257 -0.494578  
 Rh -0.012524 -0.506604 1.229034  
 N 0.787474 1.413131 0.005056  
 C 2.048473 1.230608 -0.466689  
 C 2.729740 2.213446 -1.223654  
 C 2.045316 3.419523 -1.486421  
 C 0.768228 3.591246 -0.998743  
 C 0.171510 2.560721 -0.252737  
 C 2.709395 -0.000202 -0.160641  
 C 4.034127 -0.231423 -0.602948  
 C 4.691975 0.778810 -1.377693  
 C 4.064551 1.949978 -1.676299  
 C 4.637304 -1.455515 -0.244183  
 C 3.936632 -2.370007 0.516103  
 C 2.625507 -2.070220 0.910176  
 N 2.037785 -0.921896 0.571550  
 N -1.329541 -1.766143 2.473294  
 H 0.670655 -2.743003 -0.826307  
 H -0.347837 -3.662825 -2.886331  
 H -4.426567 -1.111211 -3.336936  
 H -2.524235 -2.732754 -3.698377  
 H -5.415138 2.133090 0.090502  
 H -5.482599 0.646448 -1.967712  
 H -1.955793 1.865229 2.632976  
 H -4.179313 2.863535 2.137590  
 H -0.827720 2.687596 0.143688  
 H 0.211871 4.505330 -1.174360  
 H 4.570310 2.711885 -2.261934  
 H 2.531287 4.200620 -2.063725  
 H 5.652622 -1.667682 -0.566052  
 H 5.705559 0.591326 -1.718981  
 H 2.042604 -2.764957 1.508026  
 H 4.373845 -3.316039 0.814451  
 H -0.748737 -2.457480 2.949650  
 H -1.847896 -1.258019 3.187935  
 H -2.007638 -2.277250 1.910455  
 N 0.785761 0.415043 2.953303  
 H 1.096206 1.363870 2.746373  
 H 0.138764 0.477625 3.738657  
 H 1.601078 -0.096537 3.292144



TABLE SI.9:  ${}^3\text{MC}_3$  coordinates at B3LYP\*/3-21G/PCM(Acetonitrile)

53

N 2.080282 -1.010279 -0.763976  
C 2.803368 -0.035908 -0.110037  
C 4.171987 0.191031 -0.387437  
C 4.787954 -0.628856 -1.362917  
C 4.047028 -1.607553 -2.005770  
C 2.690780 -1.777283 -1.688639  
C 2.134048 0.752278 0.866844  
C 2.829913 1.772702 1.558292  
C 4.217721 1.991704 1.258490  
C 4.862760 1.230521 0.325422  
C 2.104653 2.522968 2.515090  
C 0.767698 2.239558 2.741241  
C 0.139194 1.208476 2.020293  
N 0.810740 0.486265 1.109302  
Rh 0.077435 -1.105552 -0.140322  
N -0.896698 0.738982 -1.130425  
C -2.213572 0.859190 -0.813261  
C -3.014664 1.902815 -1.338264  
C -2.391720 2.815450 -2.224528  
C -1.050745 2.665961 -2.540472  
C -0.316518 1.611571 -1.966316  
C -2.778644 -0.105499 0.075285  
C -4.144954 -0.006285 0.437531  
C -4.936594 1.067596 -0.097746  
C -4.396021 1.983575 -0.953766  
C -4.667779 -0.987714 1.312190  
C -3.845659 -2.002265 1.770673  
C -2.501376 -2.043300 1.368169  
N -1.973216 -1.114616 0.546670  
N 0.667541 -2.235102 1.830007  
H -0.903797 0.967732 2.184581  
H 0.191541 2.797645 3.468609  
H 4.742941 2.776410 1.792179  
H 2.603620 3.314608 3.063864  
H 5.836715 -0.484731 -1.599205  
H 5.911206 1.397623 0.103075  
H 2.102034 -2.536262 -2.185803  
H 4.493574 -2.249134 -2.754825  
H 0.735598 1.474662 -2.187045  
H -0.554029 3.348415 -3.218888  
H -5.000940 2.787815 -1.358932  
H -2.972010 3.627913 -2.649118  
H -5.709452 -0.938506 1.611370  
H -5.979857 1.128913 0.192891  
H -1.854452 -2.838758 1.710246  
H -4.217054 -2.771865 2.435625  
H 0.412825 -3.230179 1.749143  
H 1.692307 -2.158240 1.887806  
H 0.249069 -1.827288 2.676546  
N -0.553164 -2.588548 -1.560828  
H -0.391287 -2.257796 -2.525359  
H -0.052652 -3.479617 -1.416227  
H -1.562008 -2.760835 -1.443480

TABLE SI.10:  $^3\text{LC}$  coordinates at B3LYP\*/6-311G(d,f)/PCM(Acetonitrile)

53

N 1.929209 0.712291 -0.968539  
C 2.697730 0.103442 -0.014147  
C 4.045458 0.458517 0.210298  
C 4.589175 1.481711 -0.596223  
C 3.800510 2.085231 -1.553704  
C 2.469087 1.676109 -1.716088  
C 2.088405 -0.921869 0.765020  
C 2.828215 -1.588484 1.765072  
C 4.194837 -1.210878 1.977235  
C 4.778456 -0.230186 1.231969  
C 2.164777 -2.596884 2.497794  
C 0.847430 -2.889854 2.212944  
C 0.179962 -2.182979 1.201410  
N 0.783822 -1.225258 0.498858  
Rh -0.013319 -0.057751 -1.025247  
N -0.798923 1.269514 0.366780  
C -2.075478 1.019519 0.678325  
C -2.808108 1.812427 1.618117  
C -2.106302 2.902016 2.222943  
C -0.789165 3.134068 1.881328  
C -0.147584 2.311027 0.952767  
C -2.704488 -0.116237 0.009973  
C -4.069509 -0.448406 0.285715  
C -4.768935 0.332342 1.200019  
C -4.131498 1.477098 1.877517  
C -4.611082 -1.574067 -0.412731  
C -3.806077 -2.273727 -1.298314  
C -2.487964 -1.888483 -1.508191  
N -1.950233 -0.807219 -0.847691  
N 0.685890 -1.461997 -2.442406  
H -0.852841 -2.399110 0.958576  
H 0.309310 -3.659452 2.754407  
H 4.759188 -1.726220 2.748259  
H 2.696327 -3.134397 3.277310  
H 5.622313 1.785307 -0.457562  
H 5.814576 0.047040 1.400474  
H 1.837940 2.142868 -2.462004  
H 4.185412 2.873917 -2.189810  
H 0.881017 2.471477 0.662313  
H -0.232618 3.952952 2.323536  
H -4.713809 2.055730 2.585879  
H -2.616569 3.534205 2.942351  
H -5.641478 -1.867288 -0.241926  
H -5.804829 0.105647 1.427270  
H -1.840704 -2.422601 -2.188576  
H -4.189807 -3.131686 -1.839729  
H 0.070107 -1.583629 -3.246225  
H 1.592386 -1.188539 -2.822941  
H 0.819975 -2.385043 -2.028640  
N -0.727783 1.180795 -2.580392  
H -0.870050 2.141368 -2.267386  
H -0.115574 1.224115 -3.394710  
H -1.631921 0.856515 -2.925265

TABLE SI.11:  ${}^3\text{MC}_1$  coordinates at B3LYP\*/6-311G(d,f)/PCM(Acetonitrile)

53

N -2.018751 -1.182436 0.538960  
 C -2.784287 -0.140884 0.089132  
 C -4.156351 -0.033344 0.417501  
 C -4.722382 -1.049888 1.215532  
 C -3.939473 -2.106842 1.629653  
 C -2.586282 -2.142719 1.271112  
 C -2.178139 0.841249 -0.756773  
 C -2.946899 1.923445 -1.248826  
 C -4.326753 2.022916 -0.876682  
 C -4.906283 1.082619 -0.079937  
 C -2.295867 2.845532 -2.097422  
 C -0.966925 2.661053 -2.418674  
 C -0.278170 1.557798 -1.887803  
 N -0.870024 0.684801 -1.083235  
 Rh -0.000247 -1.182236 0.000636  
 N 0.871527 0.682337 1.086299  
 C 2.179067 0.839206 0.757834  
 C 2.948539 1.921022 1.249579  
 C 2.298770 2.842282 2.100034  
 C 0.970375 2.657341 2.423344  
 C 0.280833 1.554489 1.892657  
 C 2.783834 -0.142033 -0.090124  
 C 4.155391 -0.034296 -0.420476  
 C 4.906077 1.081270 0.076768  
 C 4.327782 2.020870 0.875226  
 C 4.720124 -1.050252 -1.220160  
 C 3.936500 -2.106826 -1.633935  
 C 2.583802 -2.142821 -1.273560  
 N 2.017435 -1.182956 -0.539955  
 N -0.567066 -1.969105 -1.964576  
 H 0.766554 1.384205 -2.125346  
 H -0.442432 3.347706 -3.073731  
 H -4.906547 2.861330 -1.250798  
 H -2.848821 3.691317 -2.495251  
 H -5.772124 -0.997392 1.488513  
 H -5.955357 1.158082 0.189119  
 H -1.958263 -2.969451 1.580204  
 H -4.344114 -2.913016 2.230615  
 H -0.763475 1.380488 2.131745  
 H 0.446924 3.343401 3.079854  
 H 4.908154 2.859019 1.249050  
 H 2.852235 3.687833 2.497639  
 H 5.769465 -0.997655 -1.494654  
 H 5.954723 1.157009 -0.193875  
 H 1.955170 -2.969205 -1.582349  
 H 4.340231 -2.912611 -2.236031  
 H -0.505347 -2.988261 -1.947472  
 H -1.528559 -1.738722 -2.210110  
 H 0.024882 -1.632088 -2.722706  
 N 0.565876 -1.973348 1.964481  
 H -0.024715 -1.635786 2.723420  
 H 0.501768 -2.992330 1.946206  
 H 1.528080 -1.745451 2.209507

TABLE SI.12:  ${}^3\text{MC}_2$  coordinates at B3LYP\*/6-311G(d,f)/PCM(Acetonitrile)

53

N -1.967216 0.651967 0.965636  
 C -2.618560 0.160690 -0.133483  
 C -3.880451 0.665395 -0.537106  
 C -4.454808 1.694974 0.247241  
 C -3.785824 2.166915 1.364649  
 C -2.532659 1.625206 1.701430  
 C -2.002602 -0.893739 -0.874460  
 C -2.650263 -1.422790 -2.018004  
 C -3.920288 -0.881978 -2.417342  
 C -4.513675 0.119424 -1.704865  
 C -2.010491 -2.477984 -2.711263  
 C -0.795872 -2.960082 -2.256221  
 C -0.206621 -2.394272 -1.114441  
 N -0.793599 -1.386668 -0.443862  
 Rh -0.002000 -0.460068 1.255875  
 N 0.757475 1.403867 -0.006075  
 C 2.024511 1.221817 -0.492146  
 C 2.677247 2.191035 -1.293345  
 C 1.971079 3.382264 -1.585623  
 C 0.694790 3.556622 -1.082223  
 C 0.113904 2.546620 -0.292935  
 C 2.706995 0.014257 -0.157504  
 C 4.027887 -0.215588 -0.617623  
 C 4.662398 0.778818 -1.437215  
 C 4.011590 1.933831 -1.762320  
 C 4.653609 -1.425670 -0.234109  
 C 3.974930 -2.330891 0.565951  
 C 2.664998 -2.039754 0.981686  
 N 2.056249 -0.895025 0.618414  
 N -1.337771 -1.675339 2.521857  
 H 0.742065 -2.756278 -0.743051  
 H -0.285163 -3.769533 -2.762370  
 H -4.399559 -1.294813 -3.298489  
 H -2.481166 -2.902257 -3.591812  
 H -5.418396 2.105957 -0.035063  
 H -5.475478 0.520300 -2.006591  
 H -1.983499 1.983913 2.563989  
 H -4.206105 2.950061 1.983105  
 H -0.879037 2.674771 0.112061  
 H 0.129053 4.458382 -1.281058  
 H 4.492470 2.684848 -2.380118  
 H 2.439123 4.147090 -2.196410  
 H 5.664451 -1.633988 -0.568655  
 H 5.671370 0.591435 -1.788859  
 H 2.107397 -2.726886 1.609646  
 H 4.432197 -3.261292 0.878466  
 H -0.737600 -2.305626 3.076644  
 H -1.913931 -1.107473 3.158185  
 H -1.955715 -2.242037 1.924304  
 N 0.782380 0.529273 2.956698  
 H 1.062022 1.483457 2.685167  
 H 0.112891 0.591536 3.737620  
 H 1.619029 0.024257 3.287861

TABLE SI.13:  ${}^3\text{MC}_3$  coordinates at B3LYP\*/6-311G(d,f)/PCM(Acetonitrile)

53

N 2.093730 -0.927084 -0.848789  
 C 2.833607 -0.012675 -0.144259  
 C 4.199687 0.219723 -0.412622  
 C 4.793385 -0.533403 -1.447752  
 C 4.034237 -1.451767 -2.147224  
 C 2.684094 -1.626139 -1.822918  
 C 2.175368 0.711285 0.885995  
 C 2.880418 1.670127 1.646994  
 C 4.266396 1.891761 1.357577  
 C 4.899299 1.195624 0.370847  
 C 2.161737 2.351138 2.653158  
 C 0.827734 2.060223 2.853577  
 C 0.198698 1.091473 2.056473  
 N 0.855126 0.437772 1.101287  
 Rh 0.103740 -1.046564 -0.205389  
 N -0.974008 0.813202 -1.106975  
 C -2.278473 0.890743 -0.762033  
 C -3.119559 1.924385 -1.236818  
 C -2.540152 2.878744 -2.101625  
 C -1.207555 2.773208 -2.445765  
 C -0.442863 1.719606 -1.918205  
 C -2.797180 -0.120717 0.106284  
 C -4.158480 -0.076345 0.490407  
 C -4.987540 0.988304 0.004824  
 C -4.491616 1.947235 -0.825725  
 C -4.634829 -1.102969 1.332383  
 C -3.775639 -2.103007 1.735147  
 C -2.441332 -2.077786 1.308007  
 N -1.955638 -1.112244 0.525119  
 N 0.717031 -2.360642 1.710377  
 H -0.845892 0.841287 2.200708  
 H 0.248738 2.563949 3.619120  
 H 4.806031 2.628971 1.943958  
 H 2.662843 3.096807 3.262899  
 H 5.842157 -0.387219 -1.687584  
 H 5.950082 1.370196 0.161145  
 H 2.077344 -2.343599 -2.360610  
 H 4.461241 -2.045475 -2.947182  
 H 0.608787 1.612709 -2.164400  
 H -0.737055 3.488213 -3.111482  
 H -5.131337 2.744274 -1.192768  
 H -3.148520 3.690586 -2.489292  
 H -5.673543 -1.101110 1.649123  
 H -6.028970 1.009504 0.311305  
 H -1.761365 -2.866203 1.602569  
 H -4.106764 -2.913606 2.374194  
 H 0.533826 -3.352870 1.567327  
 H 1.725301 -2.262361 1.817629  
 H 0.296871 -2.084498 2.596088  
 N -0.568790 -2.503499 -1.604743  
 H -0.492630 -2.166931 -2.565706  
 H -0.053439 -3.382422 -1.544544  
 H -1.550824 -2.730003 -1.454281

TABLE SI.14:  ${}^3\text{MC}_4$  coordinates at B3LYP\*/6-311G(d,f)/PCM(Acetonitrile)

53

N 2.229786 -0.937251 0.825447  
 C 2.933783 -0.150535 -0.026062  
 C 4.306353 -0.376154 -0.306161  
 C 4.932673 -1.458958 0.352416  
 C 4.202431 -2.243044 1.218191  
 C 2.841971 -1.949872 1.427311  
 C 2.249584 0.935591 -0.667135  
 C 2.945193 1.756466 -1.587464  
 C 4.329137 1.502457 -1.848132  
 C 4.985294 0.478475 -1.228730  
 C 2.229244 2.795188 -2.219405  
 C 0.888474 2.976208 -1.937563  
 C 0.265553 2.129306 -1.019827  
 N 0.926940 1.146397 -0.390628  
 Rh 0.000983 -0.042572 1.055393  
 N -0.942728 -1.155562 -0.433218  
 C -2.259381 -0.900302 -0.702511  
 C -2.970052 -1.657944 -1.664425  
 C -2.275890 -2.681249 -2.343851  
 C -0.942270 -2.910271 -2.064019  
 C -0.302870 -2.124354 -1.103592  
 C -2.922555 0.163489 -0.005085  
 C -4.289122 0.432416 -0.274144  
 C -4.983439 -0.357272 -1.242731  
 C -4.347789 -1.360633 -1.913791  
 C -4.894662 1.489614 0.442289  
 C -4.151981 2.207471 1.354042  
 C -2.799322 1.873818 1.551203  
 N -2.205425 0.886252 0.892534  
 N 0.925291 1.100786 2.609905  
 H -0.781579 2.245270 -0.770178  
 H 0.309410 3.760621 -2.410814  
 H 4.847494 2.142684 -2.555187  
 H 2.737382 3.441763 -2.928644  
 H 5.982885 -1.664299 0.166914  
 H 6.035764 0.294830 -1.433394  
 H 2.240708 -2.559631 2.094925  
 H 4.651485 -3.083747 1.735530  
 H 0.740379 -2.276459 -0.856407  
 H -0.380524 -3.685736 -2.571716  
 H -4.877934 -1.952791 -2.653244  
 H -2.795833 -3.279449 -3.086256  
 H -5.939492 1.727434 0.265584  
 H -6.029453 -0.140866 -1.438227  
 H -2.189237 2.429973 2.256308  
 H -4.585974 3.025994 1.917705  
 H 1.773105 0.646993 2.948070  
 H 1.198426 2.023080 2.269191  
 H 0.324373 1.259789 3.418065  
 N -0.915102 -1.248641 2.568549  
 H -1.204441 -2.150611 2.188594  
 H -0.301887 -1.450743 3.357510  
 H -1.752796 -0.801688 2.939938

TABLE SI.15:  $^3\text{LC}$  frequency list ( $\text{cm}^{-1}$ ) at B3LYP\*/3-21G/PCM(Acetonitrile)

26.5870 43.7821 50.8861  
84.2061 95.2964 119.7426  
154.8413 169.9181 177.5552  
185.8561 194.1693 196.5582  
213.4814 218.2601 230.6529  
242.2956 268.6582 269.2842  
281.8737 286.2696 292.9050  
295.9072 319.0426 329.7629  
341.7281 346.1606 433.3961  
444.4182 449.1437 453.2036  
457.2686 472.8662 479.2470  
495.8176 503.5634 514.0445  
523.8174 526.5861 530.5916  
546.5028 570.8359 574.5428  
583.2235 584.9817 651.0387  
663.1359 687.8511 710.0911  
722.5622 736.4603 751.8536  
756.1847 762.1432 765.1098  
770.2944 776.1211 801.2493  
809.3609 818.1958 824.0507  
830.1644 832.1637 849.4079  
880.1567 885.5176 890.7776  
897.9295 908.5386 913.5933  
937.6512 939.5865 950.0456  
962.6167 989.8469 992.6616  
997.3235 1020.3649 1031.4389  
1042.5084 1056.5025 1060.4160  
1061.8967 1072.2548 1083.5203  
1085.4915 1115.6529 1120.4466  
1123.6591 1134.2827 1154.1207  
1199.3942 1206.0441 1218.9463  
1234.4095 1239.2950 1245.9263  
1248.8989 1255.4994 1294.5227  
1303.4556 1315.6587 1323.5768  
1330.8703 1354.4263 1373.4417  
1375.2453 1410.3154 1418.2342  
1421.7289 1433.3538 1441.2631  
1443.0168 1453.3398 1465.2330  
1471.6724 1487.7384 1502.3679  
1505.0294 1518.1906 1521.7872  
1529.7348 1533.6459 1563.8490  
1576.0551 1594.0207 1600.3326  
1638.1116 1722.2284 1740.0540  
1747.6324 1764.2698 3201.8654  
3207.7573 3211.2248 3212.2261  
3213.5070 3215.3131 3217.1225  
3224.9218 3226.5755 3228.6642  
3230.5561 3232.1096 3246.0251  
3247.2419 3263.3616 3266.6681  
3344.7645 3348.8764 3441.3418  
3441.5257 3446.0703 3454.7555

TABLE SI.16:  ${}^3\text{MC}_1$  frequency list ( $\text{cm}^{-1}$ ) at B3LYP\*/3-21G/PCM(Acetonitrile)

26.4836 35.3636 49.3705  
85.4921 95.5300 104.6455  
114.6799 143.4658 155.7092  
160.3916 165.0186 175.2455  
183.5679 191.0179 199.8552  
219.9198 239.5122 243.5848  
245.8885 250.5305 255.1320  
266.7583 284.7748 293.4307  
311.2784 408.4563 435.7973  
442.0792 443.6050 448.3272  
470.5336 480.0375 489.8097  
502.5018 503.4074 529.5336  
531.4824 536.2473 539.2597  
579.9622 581.5021 585.1527  
588.4854 641.6100 646.4374  
670.2042 680.5841 728.4631  
738.7379 748.9102 750.1473  
758.5718 760.4900 776.4475  
778.2101 800.6008 801.0717  
805.0265 831.0161 833.2284  
846.2657 894.4990 896.5911  
897.5190 898.3981 922.9835  
931.9116 962.4615 964.8333  
992.2439 997.0561 998.5219  
1002.9002 1042.8714 1043.9809  
1056.4475 1058.1401 1062.5708  
1063.7812 1070.1139 1071.1393  
1079.3531 1081.6893 1118.3113  
1120.1580 1127.4290 1130.0118  
1192.9369 1195.5991 1206.6295  
1207.0189 1232.5923 1233.1079  
1246.9469 1249.5603 1254.1615  
1259.4206 1287.2369 1292.7321  
1313.7225 1321.6175 1322.0091  
1327.3257 1328.9537 1370.6340  
1373.5328 1384.2660 1433.7575  
1435.8957 1440.6732 1441.6113  
1474.4091 1475.2350 1486.0622  
1487.8990 1519.2337 1520.4943  
1526.0045 1526.9673 1563.5771  
1567.1252 1592.8754 1593.5958  
1599.9135 1602.0030 1635.7496  
1636.5430 1703.7071 1715.6740  
1724.6106 1735.2080 3198.2322  
3199.4942 3202.6695 3205.9582  
3206.6340 3206.9085 3208.3626  
3212.1349 3213.4327 3219.8605  
3230.6929 3232.3948 3234.0092  
3236.1452 3250.3835 3260.6984  
3347.6205 3350.5886 3446.3031  
3456.2301 3457.3642 3475.6423



TABLE SI.17:  $^3\text{MC}_2$  frequency list ( $\text{cm}^{-1}$ ) at B3LYP\*/3-21G/PCM(Acetonitrile)

|           |           |           |
|-----------|-----------|-----------|
| 30.9216   | 40.0417   | 40.0866   |
| 77.7618   | 85.3738   | 111.9041  |
| 116.2205  | 122.6862  | 153.3480  |
| 163.1738  | 171.4744  | 173.5922  |
| 177.6246  | 181.3259  | 194.8699  |
| 201.0455  | 209.5145  | 231.4141  |
| 247.5909  | 248.8251  | 262.8715  |
| 278.7208  | 288.3601  | 303.9465  |
| 303.9779  | 383.8486  | 387.4643  |
| 442.0409  | 443.0489  | 443.5601  |
| 450.2433  | 478.6720  | 481.0230  |
| 502.2781  | 504.8991  | 528.3674  |
| 528.7835  | 538.7423  | 539.7845  |
| 579.6579  | 580.0333  | 586.5119  |
| 587.0466  | 645.6962  | 648.2409  |
| 675.7196  | 682.0392  | 710.0542  |
| 723.7787  | 743.9629  | 744.2621  |
| 751.7978  | 754.0473  | 760.2815  |
| 765.4031  | 774.5700  | 777.5656  |
| 802.0593  | 802.2715  | 830.9160  |
| 831.3268  | 893.9262  | 896.6872  |
| 897.3844  | 898.0025  | 929.7386  |
| 934.1635  | 963.4868  | 963.9529  |
| 989.9675  | 990.1945  | 998.4517  |
| 998.9640  | 1042.5365 | 1042.6850 |
| 1056.5402 | 1056.6120 | 1061.7953 |
| 1061.8152 | 1067.8158 | 1069.3737 |
| 1080.0370 | 1082.3737 | 1121.3375 |
| 1122.5148 | 1128.4000 | 1131.5191 |
| 1195.7791 | 1196.4041 | 1206.2433 |
| 1206.2576 | 1232.0848 | 1232.5131 |
| 1247.5886 | 1249.9062 | 1255.0482 |
| 1255.5011 | 1294.6711 | 1296.3965 |
| 1310.0482 | 1312.1929 | 1322.1641 |
| 1322.1773 | 1329.0037 | 1329.8372 |
| 1373.2507 | 1374.2007 | 1432.4093 |
| 1433.0013 | 1441.3262 | 1443.7307 |
| 1474.8390 | 1475.0701 | 1486.5964 |
| 1488.1373 | 1520.8901 | 1522.1861 |
| 1525.2557 | 1526.2355 | 1567.6564 |
| 1567.8501 | 1594.2117 | 1594.2593 |
| 1600.7201 | 1600.7576 | 1634.8788 |
| 1635.7170 | 1709.2404 | 1709.7405 |
| 1713.0283 | 1713.6496 | 3200.0832 |
| 3200.0927 | 3205.1833 | 3205.1916 |
| 3208.0232 | 3208.0436 | 3211.9774 |
| 3212.0285 | 3213.9094 | 3213.9366 |
| 3232.8778 | 3232.9035 | 3233.4788 |
| 3233.5194 | 3250.1677 | 3250.4103 |
| 3343.0719 | 3344.7207 | 3451.8903 |
| 3452.2202 | 3470.0538 | 3470.1147 |

TABLE SI.18:  ${}^3\text{MC}_3$  frequency list ( $\text{cm}^{-1}$ ) at B3LYP\*/3-21G/PCM(Acetonitrile)

13.9077 31.5232 34.6632  
40.5337 71.0909 81.0332  
109.5365 113.5509 141.3376  
147.3739 153.1249 168.1089  
175.4569 188.4624 189.4869  
194.7070 210.2970 227.5994  
243.1499 244.3219 265.7536  
277.6276 285.1117 297.8522  
306.7830 335.8196 436.3159  
437.2203 444.6380 448.4074  
458.4285 475.8384 480.1979  
501.5597 507.5233 524.2150  
527.3438 533.6463 541.1701  
579.7294 580.0064 582.3622  
582.6298 627.2377 643.2797  
646.9939 674.7207 675.3935  
682.0578 745.5381 752.7329  
755.2874 757.8575 771.7786  
772.8162 782.1628 795.3374  
801.3943 801.8557 827.5553  
829.8942 893.1305 896.8008  
897.0540 902.7870 922.8386  
929.6099 960.9034 964.6786  
989.5667 991.5301 991.8662  
995.1745 1041.7652 1042.6138  
1055.2770 1057.0237 1061.4982  
1062.3491 1067.1261 1068.2180  
1079.3197 1080.6341 1117.5387  
1120.1784 1126.1107 1128.6745  
1192.4566 1195.1078 1205.0892  
1206.2124 1231.8320 1232.5309  
1235.5961 1243.5637 1248.8113  
1252.1864 1258.2052 1290.2996  
1291.7623 1319.3571 1321.7380  
1328.5762 1328.8265 1365.3488  
1371.2929 1373.8018 1434.8448  
1437.2205 1440.3584 1443.8089  
1469.6173 1472.1904 1485.3234  
1487.5997 1519.0216 1520.7759  
1523.5735 1525.8590 1564.0040  
1568.2281 1589.9383 1592.4068  
1596.8570 1600.9282 1634.2098  
1635.6602 1703.8409 1709.0800  
1717.4486 1722.8257 3198.8607  
3200.5870 3206.7795 3207.3593  
3207.7471 3210.1740 3212.6357  
3213.3018 3214.3139 3224.1949  
3232.6851 3232.7024 3233.6418  
3237.4129 3247.8583 3258.7965  
3338.5240 3351.0143 3437.6815  
3457.6574 3469.1371 3481.1155

TABLE SI.19:  $^3\text{LC}$  frequency list ( $\text{cm}^{-1}$ ) at B3LYP\*/6-311G(d,f)/PCM(Acetonitrile)

26.3764 43.6358 50.5603  
81.6771 94.2050 119.8276  
148.1978 167.2367 174.2062  
188.1524 196.6708 198.4407  
201.2853 214.9625 228.7016  
234.3049 267.2738 271.1057  
275.0846 284.3190 290.2241  
295.0877 320.2215 325.1137  
338.1916 343.1434 417.0880  
429.5496 435.2366 438.7987  
440.7983 454.4310 461.4697  
475.1973 481.6479 498.6029  
513.0742 514.2532 518.1225  
528.4456 544.1091 553.8333  
558.7874 569.5843 620.0198  
639.9038 665.1149 684.5081  
692.3880 710.5373 726.0289  
734.5247 735.5102 741.8931  
752.2853 774.9623 777.9344  
781.6835 784.7343 798.9458  
804.2388 808.3144 821.0999  
835.6772 845.6539 853.2381  
855.2845 874.8042 881.4957  
890.1451 892.6936 922.6065  
931.9464 960.6922 963.5773  
971.8263 985.4518 986.7201  
1008.7437 1010.7888 1011.2279  
1038.6497 1050.3940 1085.5561  
1086.5193 1113.8083 1115.5210  
1116.4122 1128.5286 1133.7218  
1171.1755 1174.1612 1194.1872  
1217.6725 1233.0827 1234.7525  
1237.7851 1246.8118 1282.6241  
1296.8836 1311.7841 1342.6226  
1345.8303 1367.0716 1369.6566  
1401.4925 1413.5315 1422.7760  
1426.1086 1439.1199 1441.0524  
1445.5140 1447.7125 1454.4593  
1457.4425 1479.9104 1506.2260  
1518.6203 1523.1171 1536.2864  
1549.7271 1555.0712 1592.3658  
1609.7984 1616.6728 1625.6857  
1653.8263 1711.2796 1720.0687  
1732.8644 1744.7202 3178.2172  
3184.8824 3187.9685 3188.4440  
3190.0620 3191.3281 3194.4502  
3201.1945 3203.3287 3204.0876  
3204.9464 3206.7336 3222.8018  
3223.5708 3238.2192 3242.7409  
3445.5280 3448.2595 3529.2684  
3530.8842 3537.2206 3543.2404

TABLE SI.20:  ${}^3\text{MC}_1$  frequency list ( $\text{cm}^{-1}$ ) at B3LYP\*/6-311G(d,f)/PCM(Acetonitrile)

25.7061 39.9274 46.8327  
78.2215 91.9508 99.1697  
108.6359 143.0848 150.5680  
153.1790 162.7209 166.7768  
173.2297 194.4876 215.2114  
221.4561 233.5507 241.6340  
243.0868 249.4429 256.2513  
263.3892 279.1691 302.7424  
319.2012 378.6722 419.2373  
426.0212 429.9164 433.6637  
446.9356 457.1024 466.3977  
489.7874 491.3928 514.0484  
516.6864 520.4321 521.1805  
551.8774 554.5707 564.8525  
566.1687 608.1331 613.6854  
646.1927 657.2251 698.5162  
718.6228 727.7779 730.4276  
731.7663 733.9146 743.4658  
744.7402 777.4027 778.9028  
796.7554 800.3459 801.2916  
838.0710 839.5496 845.4941  
853.2393 855.5199 875.4400  
880.7947 911.7669 923.0178  
959.5181 964.0983 973.3821  
974.9644 984.6245 987.1707  
1006.8832 1008.4819 1009.4333  
1011.8975 1046.6264 1047.8771  
1081.7110 1084.1319 1113.1957  
1115.5469 1123.6612 1125.7995  
1164.3718 1167.7901 1172.4928  
1174.5473 1233.1598 1233.5442  
1234.8986 1237.7762 1246.4370  
1248.0411 1279.4864 1284.9094  
1329.7150 1339.2484 1339.7062  
1343.3057 1346.7565 1366.8283  
1371.0842 1408.6485 1435.6718  
1437.3228 1443.5540 1444.5297  
1453.0214 1455.1627 1478.6698  
1479.8003 1520.9564 1522.7050  
1544.8674 1547.4769 1596.0551  
1601.4595 1616.1351 1616.5479  
1624.7237 1627.6266 1648.5920  
1651.3002 1689.1237 1692.9853  
1710.3247 1722.8238 3173.8488  
3177.1257 3178.9866 3181.8782  
3182.5193 3184.2725 3184.5780  
3187.5947 3190.5117 3196.6208  
3200.6803 3205.8998 3206.5077  
3209.3863 3220.1038 3227.1244  
3448.0091 3450.7791 3537.9936  
3544.1928 3547.3047 3562.8457

TABLE SI.21:  ${}^3\text{MC}_2$  frequency list ( $\text{cm}^{-1}$ ) at B3LYP\*/6-311G(d,f)/PCM(Acetonitrile)

22.8085 30.2209 35.0744  
58.2039 80.3200 98.6499  
102.6451 104.7054 135.9038  
143.6194 163.8655 176.8111  
180.0086 193.3287 207.8030  
214.9004 223.3974 228.1855  
233.9106 242.4705 259.1788  
273.3071 277.7469 302.8642  
309.2638 359.4920 367.4267  
424.4099 430.3568 430.5676  
433.0659 456.1661 458.8719  
488.5626 494.6925 516.2092  
517.4868 517.9722 519.3538  
550.0486 550.5748 564.5320  
565.0714 613.7889 614.9509  
652.5574 657.4101 706.6507  
718.9747 725.8536 727.5197  
731.2375 731.4760 733.7254  
741.5622 747.0359 748.7437  
776.6860 776.8227 796.8486  
797.2755 837.3607 838.0139  
853.2826 853.4046 875.2677  
878.7457 919.4402 923.7149  
959.0834 959.1197 962.6899  
963.1839 984.9276 984.9692  
1006.4392 1006.5411 1009.2228  
1009.2418 1043.6365 1046.0647  
1079.8950 1081.5728 1113.6270  
1114.2474 1122.5248 1124.9320  
1166.4299 1166.5991 1173.6930  
1173.7180 1230.6584 1233.0132  
1233.1599 1234.1006 1245.8945  
1246.4953 1282.0272 1283.7176  
1337.3307 1337.6552 1338.6533  
1341.7587 1344.5763 1344.8866  
1367.3679 1368.0894 1434.6419  
1434.9844 1441.1956 1442.4796  
1452.2448 1453.8399 1476.4722  
1478.6840 1522.0756 1523.0793  
1542.0539 1543.9447 1598.8627  
1599.2368 1617.0175 1617.3310  
1626.3362 1626.4483 1648.9949  
1649.7422 1694.6516 1695.1404  
1699.1984 1699.6309 3175.6142  
3175.6207 3183.2217 3183.2649  
3184.2236 3184.2411 3188.9996  
3189.0369 3189.5048 3189.6268  
3204.8464 3204.9509 3205.2397  
3205.3193 3218.3581 3218.6693  
3445.7415 3446.9403 3541.5499  
3541.8494 3558.0438 3558.1203

TABLE SI.22:  $^3\text{MC}_3$  frequency list ( $\text{cm}^{-1}$ ) at B3LYP\*/6-311G(d,f)/PCM(Acetonitrile)

22.4009 31.5745 33.0783  
72.9273 78.7283 92.5574  
107.0122 118.7688 136.0399  
137.8223 148.2658 158.4326  
163.5686 169.2674 185.9853  
194.7923 210.1479 221.6593  
232.1655 232.8810 261.6196  
266.5266 276.2561 280.0516  
298.2712 318.1791 418.2310  
424.7482 427.9954 434.5449  
443.3415 451.6130 459.4627  
488.0414 497.0532 511.1681  
512.5084 513.9343 519.5083  
547.1179 550.0889 564.3466  
565.8368 591.0816 609.5805  
613.2940 638.1369 649.1070  
661.2477 724.5056 725.5524  
731.4008 732.9567 739.5958  
747.9281 775.8632 776.8059  
783.1472 787.7703 797.7599  
799.6188 836.9576 841.8710  
853.3222 853.5670 874.6995  
887.2300 910.6187 922.6304  
960.2157 961.1722 965.2152  
970.2258 984.1721 985.1304  
1005.2092 1009.8162 1010.5889  
1012.6362 1044.0019 1045.1450  
1077.6690 1079.9324 1106.1613  
1110.8712 1118.3880 1121.0638  
1162.8278 1167.0412 1171.7021  
1172.9775 1225.7528 1228.0160  
1232.6081 1236.3507 1243.1650  
1246.4504 1262.2633 1276.5976  
1279.2568 1335.1735 1338.2658  
1345.6642 1347.4745 1365.0542  
1367.5656 1384.8595 1434.5940  
1435.4516 1440.2552 1444.4745  
1450.3433 1451.0821 1475.7981  
1477.7936 1520.4316 1520.7279  
1540.5595 1544.6669 1594.4897  
1598.9374 1609.0523 1614.3342  
1621.4169 1626.0599 1647.1861  
1650.0638 1687.7659 1697.0114  
1702.2294 1704.7508 3173.4681  
3177.3511 3180.5643 3183.4941  
3186.9454 3186.9923 3187.5028  
3187.5656 3191.0853 3204.2281  
3204.7027 3205.2790 3206.8254  
3215.7673 3220.6918 3229.8653  
3443.2190 3451.0386 3533.7107  
3543.2390 3555.6641 3562.6451

TABLE SI.23:  ${}^3\text{MC}_4$  frequency list ( $\text{cm}^{-1}$ ) at B3LYP\*/6-311G(d,f)/PCM(Acetonitrile)

23.6268 29.2211 43.5883  
80.4464 89.1625 101.8674  
110.8693 123.5255 134.6011  
152.0904 156.2791 164.6491  
167.0374 176.5331 199.5561  
209.2942 216.9810 232.1729  
233.6681 235.3497 256.8910  
262.2920 264.0508 299.0434  
306.0938 396.3848 417.0174  
420.7595 425.3770 428.1486  
442.9462 446.0912 453.9536  
483.6223 486.7896 511.9545  
513.8449 514.9610 515.1849  
545.0985 548.0822 559.4812  
561.5146 609.2303 615.4299  
653.3160 654.4369 725.9208  
729.9168 730.3834 731.4268  
737.6280 740.8491 751.2652  
756.7627 778.6266 778.7972  
801.1904 803.3084 811.1792  
837.5224 838.5797 842.1715  
855.9647 856.6603 874.8025  
876.8968 913.7253 915.5285  
968.0171 969.2485 973.1667  
973.3142 984.7040 985.3441  
1009.2687 1009.7599 1011.7147  
1011.7342 1042.1242 1044.6400  
1072.3383 1077.1630 1109.5091  
1110.1669 1116.3347 1120.4311  
1163.2537 1163.7386 1170.1557  
1171.2687 1223.6333 1227.9645  
1233.3385 1233.6068 1245.2494  
1246.2182 1274.7626 1277.6558  
1317.3024 1326.7892 1344.0361  
1346.0428 1362.1622 1365.7190  
1375.5901 1411.0204 1420.4262  
1426.4457 1440.2395 1442.1173  
1448.0483 1451.6712 1468.0150  
1471.5225 1520.2632 1521.3225  
1534.8436 1537.5720 1583.9442  
1590.0539 1595.2798 1597.6876  
1613.5067 1618.8585 1625.3036  
1626.9859 1692.2299 1698.1701  
1713.4871 1718.1202 3175.0681  
3175.1297 3178.8600 3180.6159  
3182.7526 3185.1956 3185.9965  
3187.6553 3188.8207 3189.1558  
3203.3509 3204.2874 3206.6842  
3207.5469 3220.2304 3223.9379  
3447.0392 3450.3608 3537.6222  
3538.9743 3545.1696 3549.9133
